# Supplementary material for: Genome-Wide Identification of the Cytochrome P450 Superfamily Genes and Targeted Editing of BnCYP704B1 Confers Male Sterility in Rapeseed
Source: MDPI journal article supplement (doi:10.3390/plants12020365), 2023-01-12
Supplement: s1 [file s1]

Figure S1.

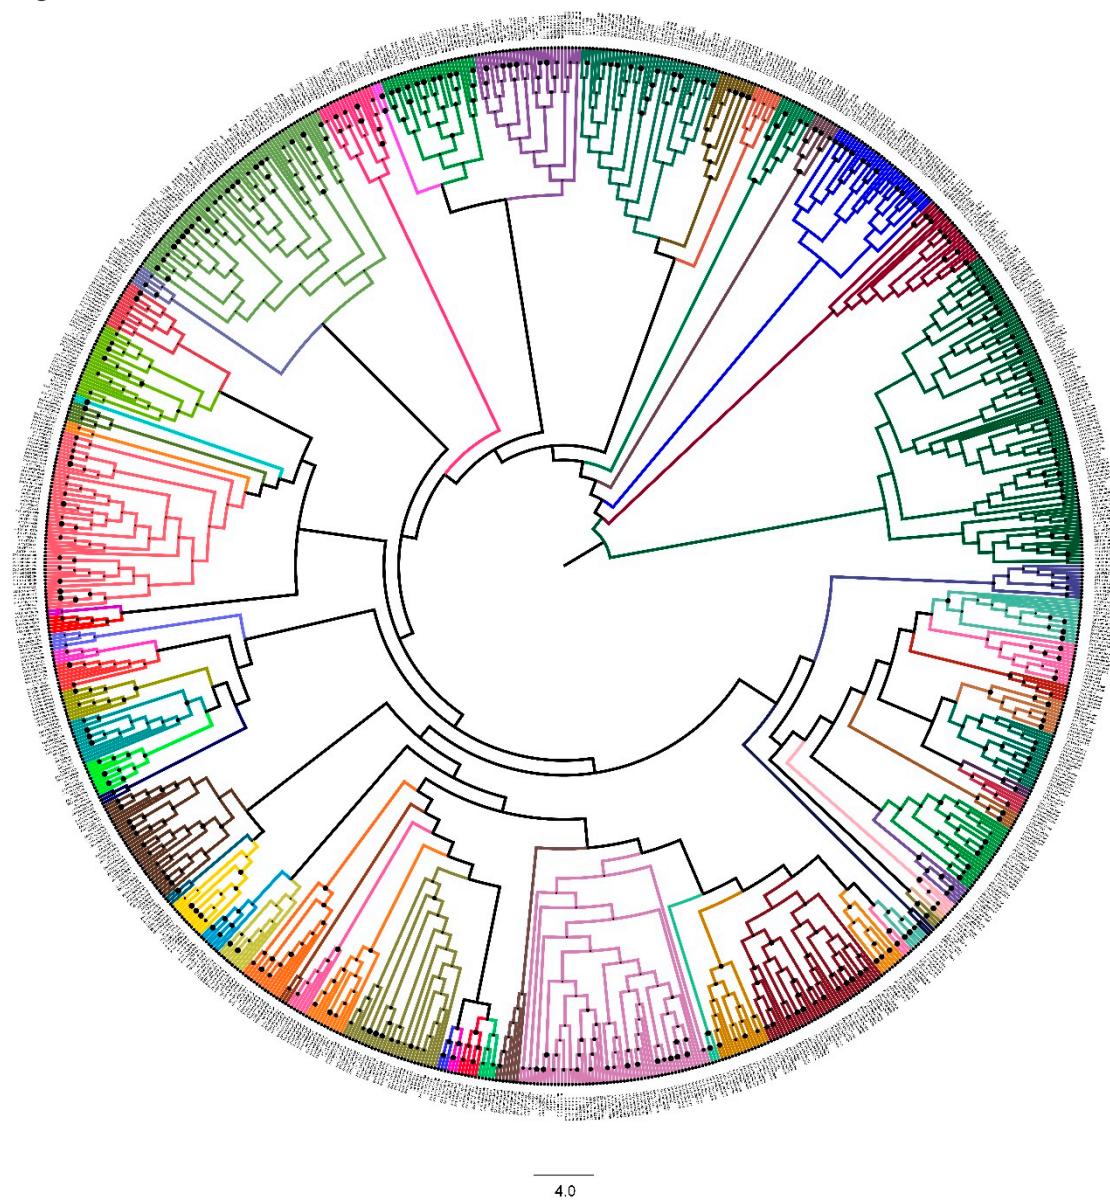

Figure S1. Phylogenetic analysis of AtCYP450s and BnCYP450s.

Figure S2.

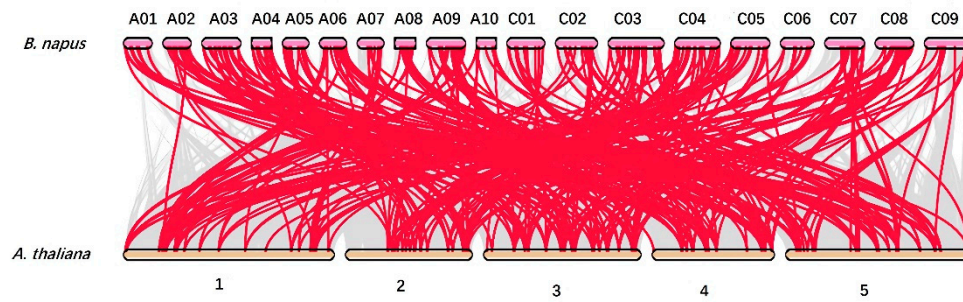

Figure S2. Synteny analysis of *AtCYP450* and *BnCYP450* genes. The gray lines indicate all collinear blocks, and the red lines highlight the orthologous relationships between *BnCYP450*s and *AtCYP450*s respectively.

Figure S3.

|                   |                                                                              |     |
|-------------------|------------------------------------------------------------------------------|-----|
| BnCYP704B1a       | MSMWIVLACM <b>L</b> TSWIFLHRWGQRNKRGPKTWPLVGAAIEQLTNFDRMHDWLVEYLYDSRT        | 60  |
| BnCYP704B1b       | MSMWIVLACM <b>V</b> TSWIFLHRWGQRNKRGPKTWPLVGAAIEQLTNFDRMHDWLVEYLYDSRT        | 60  |
| *****:*****       |                                                                              |     |
| BnCYP704B1a       | VVVPMPFTTYTYIADPINVEHVLKTNFSNYPKGETYHSYMEVLLGDGIFNSDGELWRKQR                 | 120 |
| BnCYP704B1b       | VVVPMPFTTYTYIADPINVEHVLKTNFSNYPKGETYHSYMEVLLGDGIFNSDGELWRKQR                 | 120 |
| *****             |                                                                              |     |
| BnCYP704B1a       | KTASFEFASKNLRDFSTVVFKEYSLKLFILCQAS <b>F</b> KDQQVDMQELLMRMTLDSICKVGF         | 180 |
| BnCYP704B1b       | KTASFEFASKNLRDFSTVVFKEYSLKLFILCQAS <b>S</b> KDQQVDMQELLMRMTLDSICKVGF         | 180 |
| ***** *****       |                                                                              |     |
| BnCYP704B1a       | GVEIGTLAP <b>D</b> LPENRFAKAFDTANIIVTLRFIDPLW <b>M</b> KKYLNIGSEALLGKSIKVDDF | 240 |
| BnCYP704B1b       | GVEIGTLAP <b>E</b> LPENRFAKAFDTANIIVTLRFIDPLW <b>I</b> KKYLNIGSEALLGKSIKVDDF | 240 |
| *****:*****:***** |                                                                              |     |
| BnCYP704B1a       | TYSMIRRR <b>K</b> TEILEAQKSPSN <b>I</b> KMKHDILSRFIEISDDPSKSTEKSLRDIVLNFVIAG | 300 |
| BnCYP704B1b       | TYSMIRRR <b>A</b> TEILEAQKSPSN <b>T</b> KMKHDILSRFIEISDDPSKSTEKSLRDIVLNFVIAG | 300 |
| *****:***** ***** |                                                                              |     |
| BnCYP704B1a       | RDTTATTLTWAIIYIMMNEHVAEKLCESELQELEREKAEETNTPLRQYDTEDFKSFNERVT                | 360 |
| BnCYP704B1b       | RDTTATTLTWAIIYIMMNEHVAEKLCESELQELEREKAEETNTPLRQYDTEDFKSFNERVT                | 360 |
| *****             |                                                                              |     |
| BnCYP704B1a       | QFAGMLSYSLSGLKHLHAVVTETLRLYPVPQDPKGVLEDDILPNGTKVKAGGMVTYVP                   | 420 |
| BnCYP704B1b       | QFAGMLSYSLSGLKHLHAVVTETLRLYPVPQDPKGVLEDDILPNGTKVKAGGMVTYVP                   | 420 |
| *****             |                                                                              |     |
| BnCYP704B1a       | YSMGRMEYNWGSDA <b>A</b> TFKPERWLKDGMFQNASPFKFTAFQAGPRICLGKDSAYLQMKMAM        | 480 |
| BnCYP704B1b       | YSMGRMEYNWGSDA <b>M</b> FKPERWLKDGMFQNASPFKFTAFQAGPRICLGKDSAYLQMKMAM         | 480 |
| ***** *****       |                                                                              |     |
| BnCYP704B1a       | AILCRFY <b>K</b> FHLVPNHPVKYRMMTILSMAHGLKVTVSRRS                             | 519 |
| BnCYP704B1b       | AILCRFY <b>R</b> FHLVPNHPVKYRMMTILSMAHGLKVTVSRRS                             | 519 |
| *****:*****       |                                                                              |     |

Figure S3. Alignment the protein sequences of *BnCYP704B1a* and *BnCYP704B1b*. The protein sequences of BnCYP704B1a and BnCYP704B1b are aligned with Clustal Omega. The 8 amino acid-replacements are indicated by yellow box.

Figure S4.

|               |                                                              |     |
|---------------|--------------------------------------------------------------|-----|
| BnCYP704B1a   | ATGTCTATGTGGATCGTTCTAGCTTGCATGTTACATCATGGATCTTCTTGACCCGATGG  | 60  |
| BnCYP704B1b   | ATGTCTATGTGGATCGTTCTAGCTTGCATGTTACATCATGGATCTTCTTGACCCGATGG  | 60  |
| ***** * ***** |                                                              |     |
| BnCYP704B1a   | GGACAGAGGAACAAGAGAGGTCCCAAGACATGGCCTTTGGTCGGAGCAGCCATTGAGCAG | 120 |
| BnCYP704B1b   | GGACAGAGGAACAAGAGAGGTCCCAAGACATGGCCTTTGGTCGGAGCAGCCATTGAGCAG | 120 |
| *****         |                                                              |     |
| BnCYP704B1a   | TTGACTAACTTTGACCGAATGCACGACTGGCTCGTTGAGTATCTTTACGACTCAGAACC  | 180 |
| BnCYP704B1b   | TTGACTAACTTTGACCGAATGCACGACTGGCTCGTTGAGTATCTTTACGACTCAGAACC  | 180 |
| *****         |                                                              |     |
| BnCYP704B1a   | GTAGTGGTTCCATGCCCTTACCACCTTAACATACATAGCAGATCCCATCAATGTGAA    | 240 |
| BnCYP704B1b   | GTAGTGGTTCCATGCCCTTACCACCTTAACATACATAGCAGATCCCATCAATGTGAA    | 240 |
| ***** *****   |                                                              |     |
| BnCYP704B1a   | CACGTCTCAAACCAATTCTCCAACACCCAAAGGGAGAGACGTACCACTCTATATG      | 300 |
| BnCYP704B1b   | CACGTCTCAAACCAATTCTCCAACACCCAAAGGGAGAGACGTACCACTCTATATG      | 300 |
| ***** *****   |                                                              |     |
| BnCYP704B1a   | GAAGTTTGTGGGAGATGGGATCTTCAATTCAGATGGAGAGCTCTGGAGGAAACAGAGG   | 360 |
| BnCYP704B1b   | GAAGTTTGTGGGAGATGGGATCTTCAATTCAGATGGAGAGCTCTGGAGGAAACAGAGG   | 360 |
| *****         |                                                              |     |
| BnCYP704B1a   | AAAACCGCGAGTTTCGAATTTGCTTCCAAGAATCTTAGAGACTTCAGTACTGTAGTGTTT | 420 |
| BnCYP704B1b   | AAAACCGCGAGTTTCGAATTTGCTTCCAAGAATCTTAGAGACTTCAGTACTGTAGTGTTT | 420 |
| *****         |                                                              |     |
| BnCYP704B1a   | AAAGAGTATAGCCTCAAGCTCTTCTCCATCCTTTGTCAAGCTCTTCAAAGACCAACAA   | 480 |
| BnCYP704B1b   | AAAGAGTATAGCCTCAAGCTCTTCTCCATCCTTTGTCAAGCTCTTCAAAGACCAACAA   | 480 |
| *****         |                                                              |     |
| BnCYP704B1a   | GTAGACATGCAGGAATGTTGATGAGAATGACTCTAGACTCCATATGTAAAGTGGGATTT  | 540 |
| BnCYP704B1b   | GTAGACATGCAGGAATGTTGATGAGAATGACTCTAGACTCCATATGTAAAGTGGGATTT  | 540 |
| *****         |                                                              |     |
| BnCYP704B1a   | GGTGTGGAGATAGGAACATTGCTCCAGACTACCAGAGAATCGCTTTGCTAAAGCTTTC   | 600 |
| BnCYP704B1b   | GGTGTGGAGATAGGAACATTGCTCCAGACTACCAGAGAATCGCTTTGCTAAAGCTTTC   | 600 |
| *****         |                                                              |     |
| BnCYP704B1a   | GATACCGCAATATAATCGTAACACTTCGTTTCATAGACCTCTTTGGAAGATAAAAAG    | 660 |
| BnCYP704B1b   | GATACCGCAATATAATCGTAACACTTCGTTTCATAGACCTCTTTGGAAGATAAAAAG    | 660 |
| *****         |                                                              |     |

|               |                                                               |      |
|---------------|---------------------------------------------------------------|------|
| BnCYP704B1a   | TACCTTAACATAGGATCTGAGGCATTACTTGGCAAGAGCATAAAAGTAGTCGATGATTTC  | 720  |
| BnCYP704B1b   | TACCTTAACATAGGATCTGAGGCATTACTTGGCAAGAGCATAAAAGTAGTCGATGATTTC  | 720  |
| *****         |                                                               |      |
| BnCYP704B1a   | ACATATTCAATGATAAGAAGAAGGAAA CAGAGATATTAGAGGCACA AAATCTCCTTCC  | 780  |
| BnCYP704B1b   | ACATATTCAATGATAAGAAGAAGGAAA CAGAGATATTAGAGGCACA AAATCTCCTTCC  | 780  |
| ***** *****   |                                                               |      |
| BnCYP704B1a   | AACAACA TAAGATGAAGCATGATATACTCTCGAGGTT ATTGAGATCAGCGACGATCCT  | 840  |
| BnCYP704B1b   | AACAACA TAAGATGAAGCATGATATACTCTCGAGGTT ATTGAGATCAGCGACGATCCT  | 840  |
| *****         |                                                               |      |
| BnCYP704B1a   | GATAGCAAATCAACTGAGAAAAGCCTAAGAGA ATAGTCCT AACTTTGTTATTGCTGGA  | 900  |
| BnCYP704B1b   | GATAGCAAATCAACTGAGAAAAGCCTAAGAGA ATAGTCCT AACTTTGTTATTGCTGGA  | 900  |
| *****         |                                                               |      |
| BnCYP704B1a   | AGAGATACAACAGCAACAACCTCTCACTTGGGCTATATA ATGATAATGATGAATGAACAT | 960  |
| BnCYP704B1b   | AGAGATACAACAGCAACAACCTCTCACTTGGGCTATATA ATGATAATGATGAATGAACAT | 960  |
| *****         |                                                               |      |
| BnCYP704B1a   | GT GCCGAGAAGCTTTGCTCAGAGCTACAAGAACTCGAAAGAGAAAAGGC GAAGAGACA  | 1020 |
| BnCYP704B1b   | GT GCCGAGAAGCTTTGCTCAGAGCTACAAGAACTCGAAAGAGAAAAGGC GAAGAGACA  | 1020 |
| ** *****      |                                                               |      |
| BnCYP704B1a   | AACACACCGTTGCGTCAATACGATACAGAGGACTTCAAGTCCTTCAACGAGAGGGTAACA  | 1080 |
| BnCYP704B1b   | AACACACCGTTGCGTCAATACGATACAGAGGACTTCAAGTCCTTCAACGAGAGGGTAACA  | 1080 |
| *****         |                                                               |      |
| BnCYP704B1a   | CAGTTTGCAGGAATGTTGAGTTATGATTCTTTAGGAAAATTACA TACTTACATGC GTG  | 1140 |
| BnCYP704B1b   | CAGTTTGCAGGAATGTTGAGTTATGATTCTTTAGGAAAATTACA TACTTACATGC GTG  | 1140 |
| *****         |                                                               |      |
| BnCYP704B1a   | GTAACAGAAACACTTCGTCTCTACCCAGCAGTTCCTCAGGATCCAAAAGGAGTGTTAGAA  | 1200 |
| BnCYP704B1b   | GTAACAGAAACACTTCGTCTCTACCCAGCAGTTCCTCAGGATCCAAAAGGAGTGTTAGAA  | 1200 |
| *****         |                                                               |      |
| BnCYP704B1a   | GATGATATATT CTAATGGAACAAAAGTAAAAGCAGGAGG ATGGTAACATATGTTTCCT  | 1260 |
| BnCYP704B1b   | GATGATATATT CTAATGGAACAAAAGTAAAAGCAGGAGG ATGGTAACATATGTTTCCT  | 1260 |
| *****         |                                                               |      |
| BnCYP704B1a   | TACTCAATGGGTCGTATGGA TACAAC TGGGGATCAGATGCAGC A GTTTAAACC GA  | 1320 |
| BnCYP704B1b   | TACTCAATGGGTCGTATGGA TACAAC TGGGGATCAGATGCAGC A GTTTAAACC GA  | 1320 |
| ***** * ***** |                                                               |      |

|             |                                                               |      |
|-------------|---------------------------------------------------------------|------|
| BnCYP704B1a | AGATGGCTTAAAGATGGGATGTTTCAGAACGCTTCCCCATTCAAGTTCACAGCATTTTCAG | 1380 |
| BnCYP704B1b | AGATGGCTTAAAGATGGGATGTTTCAGAACGCTTCCCCATTCAAGTTCACAGCATTTTCAG | 1380 |
|             | *****                                                         |      |
| BnCYP704B1a | GCTGGACCTAGATATGCTTGGGAAAGATTTCAGCTTATCTACAAATGAAGATGGCATG    | 1440 |
| BnCYP704B1b | GCTGGACCTAGATATGCTTGGGAAAGATTTCAGCTTATCTACAAATGAAGATGGCATG    | 1440 |
|             | ***** ***** *****                                             |      |
| BnCYP704B1a | GCAATTCTTTGCAGATTATATGTTCCATTGGTACCAAATCATCCTGTCAAGTACCGG     | 1500 |
| BnCYP704B1b | GCAATTCTTTGCAGATTATATGTTCCATTGGTACCAAATCATCCTGTCAAGTACCGG     | 1500 |
|             | ***** *****                                                   |      |
| BnCYP704B1a | ATGATGACAATTCTATCTATGGCGCATGGTTTGAAAGTTACTGTATCCAGACGTTTCATAG | 1560 |
| BnCYP704B1b | ATGATGACAATTCTATCTATGGCGCATGGTTTGAAAGTTACTGTATCCAGACGTTTCATAG | 1560 |
|             | *****                                                         |      |

Figure S4. Alignment the CDS sequences of *BnCYP704B1a* and *BnCYP704B1b*. The CDS sequences of *BnCYP704B1a* and *BnCYP704B1b* are aligned with Clustal Omega. The 41 nucleotide-replacements are indicated by green box.

Figure S5.

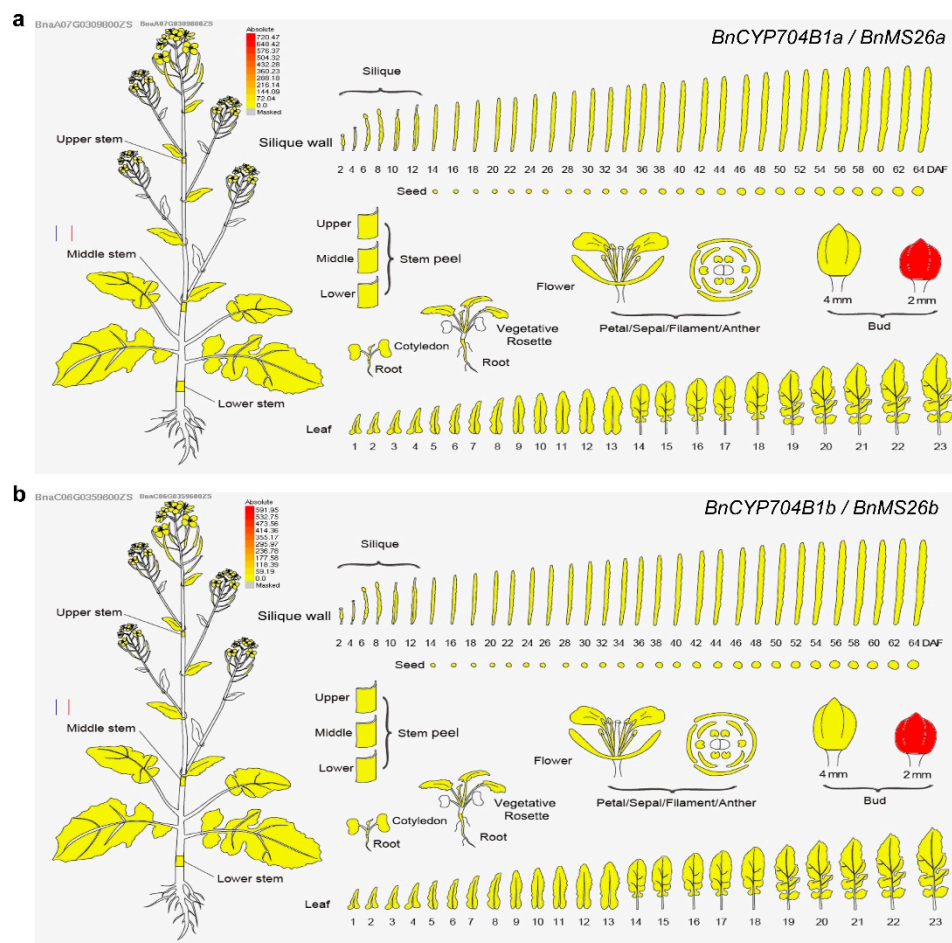

Figure S5. The expression profiles of *BnCYP704B1a* and *BnCYP704B1b*. The expression levels of *BnCYP704B1a* and *BnCYP704B1b* were obtained from the *Brassica napus* RNA-seq data (<http://yanglab.hzau.edu.cn/BnTIR>).



Figure S6.

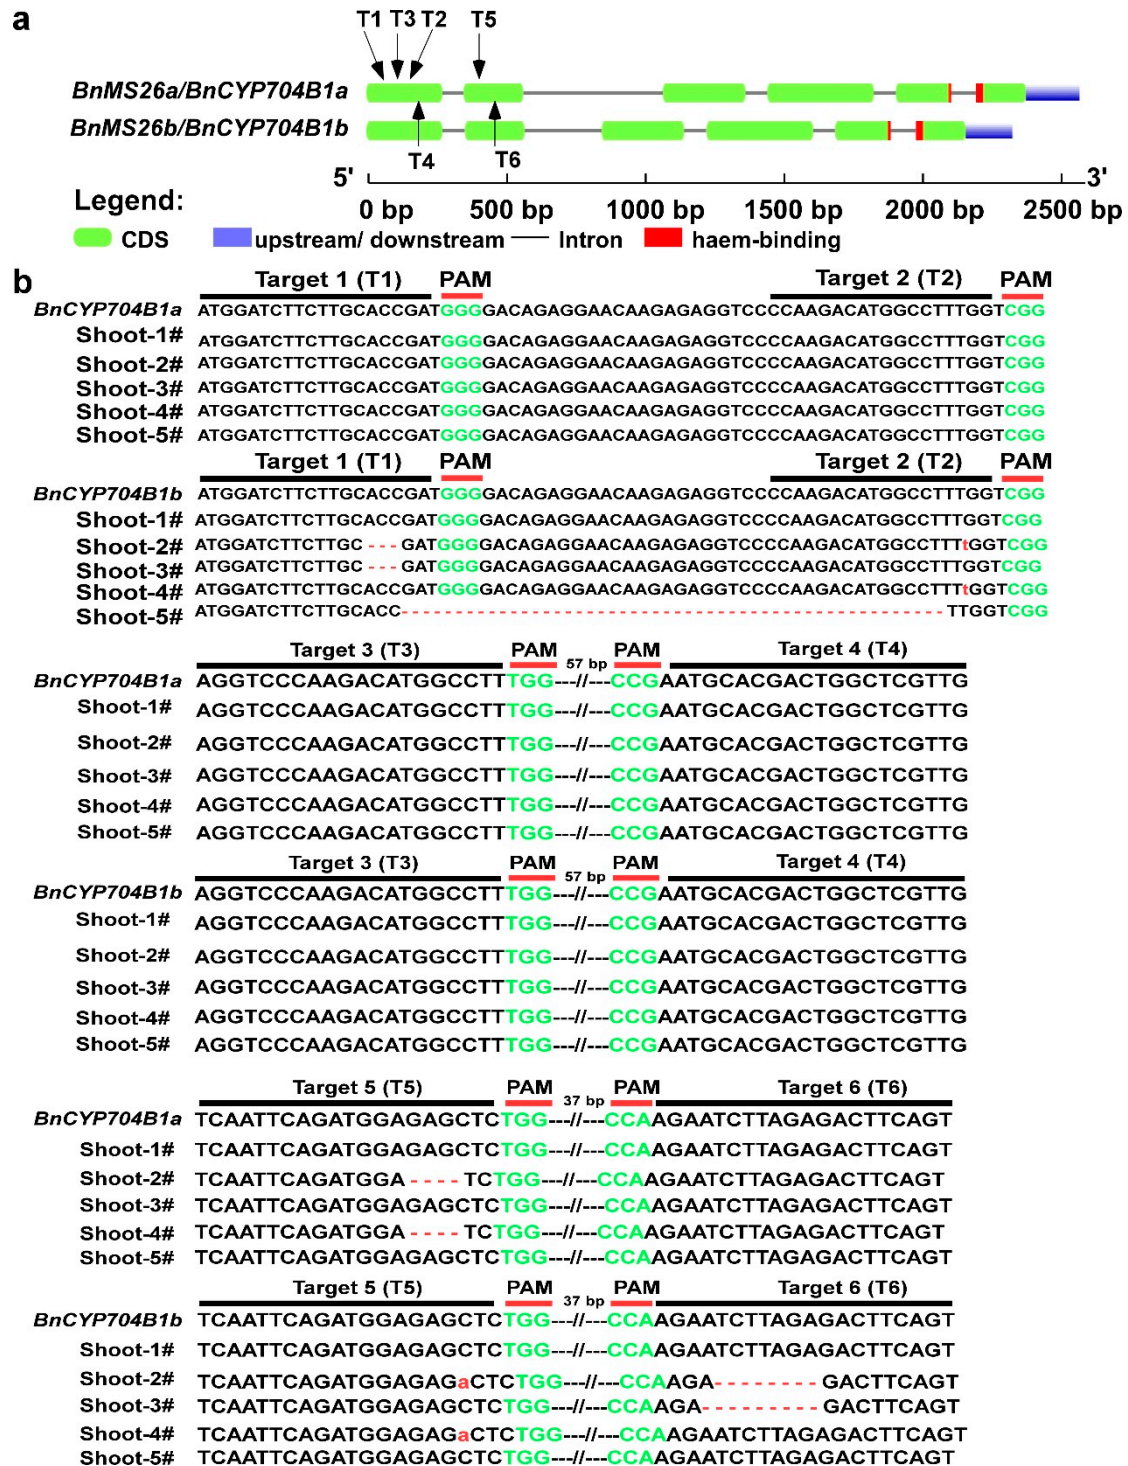

Figure S6. The sgRNA target sites and induced mutations upon *BnCYP704B1a* and

*BnCYP704B1b* in regenerated shoots. (a) Gene structures of *BnCYP704B1a* and

*BnCYP704B1b* and the corresponding CRISPR/Cas9 guide RNA target sites marked by

black arrows. (b) Mutated genotypes of *BnCYP704B1a* and *BnCYP704B1b* in



regenerated shoots derived from infected hypocotyl explants. The target sites sequences are marked in *BnCYP704B1a* and *BnCYP704B1b* sequences with PAM green highlighted.
